# Supplementary material for: Direct Formation and Structural Characterization of Electride C12A7
Source: MDPI journal article supplement (doi:10.3390/ma12010084), 2018-12-27
Supplement: s1 [file s1]

# Direct Formation and Structural Characterization of Electride C12A7

J.R. Salasin <sup>1,2</sup>, S.E.A Schwerzler <sup>1</sup>, R. Mukherjee <sup>3</sup>, D.J Keffer <sup>1</sup>, K.E. Sickafus <sup>1</sup>, and C.J. Rawn <sup>1,2,\*</sup>

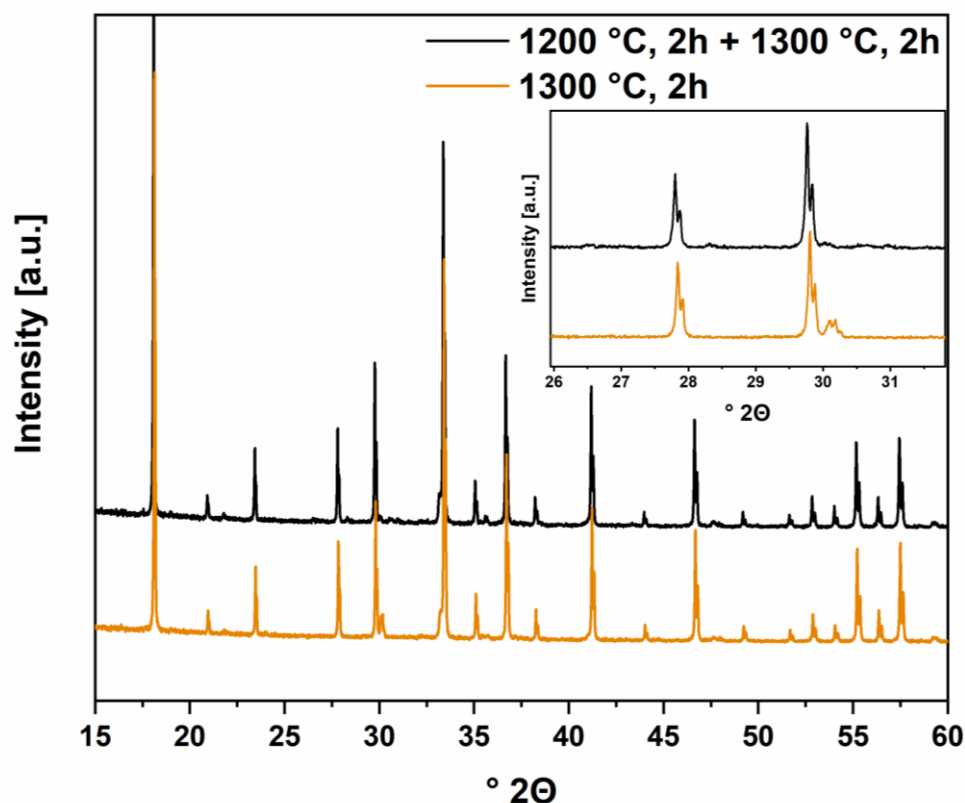

**Figure S1.** XRD patterns of HUP-processed oxy-C12A7 comparing the final characteristic structure after sintering at 1300 °C for 2 h. The black process involved an additional step at 1200 °C for 2 h prior to the 1300 °C for 2 h. This was to allow for full decomposition of the C12A7 structure at 1200 °C where oxy-C12A7 is unstable. Subtle changes in characteristic peaks were observed, indicating that both samples were primarily C12A7; however, when no hold at 1200 °C was implemented, an increase in CA characteristic peaks at 30°  $2\theta$  was observed. Structural Rietveld refinement, detailed in the main text, indicates that a structural difference between the two samples is a significant indication that the electride formation rate was increased when the hold at 1200 °C was observed.
